# Supplementary material
Source: publisher site journal article supplement (https://www.dovepress.com/article/499080)
Supplement: Supplementary file 1 [file get_supplementary_file.php]

**Table S1 Search term list**

| **Literature retrieval website** | **Document retrieval** |
| --- | --- |
| Web of Science | TS = ((tic disorder OR Tourette syndrome) AND (subtype OR classification) AND (clustering* OR unsupervised learning* OR Machine learning* OR subtyping*)) and Preprint Citation Index (Exclude – Database) |
| PubMed | (((tic disorder) OR (Tourette syndrome)) AND ((subtype) OR (classification)) AND ((clustering) OR (unsupervised learning) OR (Machine learning) OR (subtyping))) |

**Table S2 Risk of Bias Included Nonrandomized Trials (ROBINS-I)**

| **Study** | **Confounding** | **Selection of Participants** | **Classification of Interventions** | | **Deviations from Intended Interventions** | | **Missing Data** | | **Measurement of Outcomes** | | **Selective Reporting** | | **Overall** |
| --- | --- | --- | --- | --- | --- | --- | --- | --- | --- | --- | --- | --- | --- |
| Alsobrook and Pauls (2002)17 | Moderate | Serious | | Low | | No information | Moderate | Moderate | | Moderate | | Moderate | |
| Eapen et al., (2004)26  Storch et al., (2007)18  Robertson and Cavanna (2007)19  Mathews et al., (2007)20  Grados and Mathews (2008)27 | Moderate  Moderate  Moderate  Moderate  Moderate | Serious  Serious  Serious  Serious  Serious | | Low  Low  Low  Low  Low | | No information  No information  No information  No information  No information | Moderate  Moderate  Moderate  Moderate  Moderate | Moderate  Moderate  Moderate  Low  Low | | Moderate  Moderate  Low  Moderate  Low | | Moderate  Moderate  Moderate  Moderate  Moderate | |
| Robertson et al., (2008)21  Cavanna et al., (2011)22  McGuire et al., (2013)23  Rodgers et al., (2014)28  de Haan et al., (2015)24  Hirschtritt et al., (2016)25  Huisman-van Dijk et al., (2016)29  Darrow et al., (2017)30  Hirschtritt et al., (2018)31  Cravedi et al., (2018)32 | Moderate  Moderate  Moderate  Moderate  Moderate  Moderate  Moderate  Moderate  Moderate  Moderate | Serious  Serious  Moderate  Moderate  Moderate  Low  Serious  Low  Low  Serious | | Low  Low  Low  Low  Low  Low  Low  Low  Low  Moderate | | No information  No information  No information  No information  No information  No information  No information  No information  No information  No information | Low  Low  Moderate  Moderate  Moderate  Moderate  Moderate  Moderate  Moderate  Moderate | Moderate  Moderate  Low  Moderate  Low  Low  Low  Low  Low  Low | | Low  Low  Moderate  Moderate  Moderate  Low  Low  Low  Low  Moderate | | Moderate  Moderate  Moderate  Moderate  Moderate  Moderate  Moderate  Moderate  Moderate  Moderate | |
